## RESEARCH ARTICLE

# High-fat-diet-induced obesity upregulates the expression of lymphoid chemokines and promotes the formation of gastric lymphoid follicles after *Helicobacter suis* infection

Wen-jun Zhao<sup>1</sup>, Zi-bin Tian<sup>1</sup>, Shan-shan Yao<sup>2</sup>, Ya-nan Yu<sup>1</sup>, Cui-ping Zhang<sup>1</sup>, Xiao-yu Li<sup>1</sup>, Tao Mao<sup>1</sup>, Xue Jing<sup>1</sup>, Xue-li Ding<sup>1</sup>, Ruo-ming Yang<sup>1</sup>, Ya-qian Liu<sup>1</sup>, Shuai-qing Zhang<sup>3</sup> and Lin Yang<sup>1,\*</sup>

<sup>1</sup>Department of Gastroenterology, The Affiliated Hospital of Qingdao University, 16 Jiangsu Road, Qingdao 266003, China, <sup>2</sup>Clinical Skill Training Center, The Affiliated Hospital of Qingdao University, 16 Jiangsu Road, Qingdao 266003, China and <sup>3</sup>Department of Gastroenterology, Qilu Hospital of Shandong University (Qingdao), Qingdao 266000, China

\*Corresponding author: Department of Gastroenterology, The Affiliated Hospital of Qingdao University, 16 Jiangsu Road, Qingdao 266003, Shandong, China. Tel: +86-532-82911304; Fax: +86-532-82911876; E-mail: [qdfyxhmk@126.com](mailto:qdfyxhmk@126.com)

One sentence summary: Obesity promotes the formation of gastric MALT induced by *Helicobacter suis*.

Editor: Nicholas Carbonetti

## ABSTRACT

*Helicobacter suis* colonizes the stomachs of a variety of animals, including humans, and is more likely than other *Helicobacter* species to induce gastric mucosa-associated lymphoid tissue lymphoma. Obesity is a low-grade chronic inflammatory state in which the induction of a chemokine network contributes to a variety of diseases. However, the effect of obesity on the development of gastric MALT in the presence of *H. suis* infection remains unclear. Here, we reveal that high-fat-diet-induced obesity upregulates the expression of lymphoid chemokines in the stomach and accelerates the *H. suis* infection-induced formation of gastric lymphoid follicles, potentially via a mechanism that involves the activation of the nuclear factor kappa B (NF- $\kappa$ B) signaling pathway. These findings provide novel insight into the pathogenesis of obesity-related diseases, especially those induced by *Helicobacter* infection.

**Keywords:** obesity; *Helicobacter suis*; gastric lymphoid follicles; chemokine

## INTRODUCTION

*Helicobacter suis* belongs to the non-*H. pylori* Helicobacters and was originally named 'H. heilmannii' type 1 (O'Rourke et al. 2004b). *Helicobacter suis* colonizes the stomach of more than 60% of slaughter pigs and causes chronic gastritis and ulcers of the

pars esophagea (Queiroz et al. 1996; Roosendaal et al. 2000; Hellemans et al. 2007; Haesebrouck et al. 2009). It has also been associated with human gastric diseases, including gastritis, peptic ulcer and gastric mucosa-associated lymphoid tissue (MALT) lymphoma (Morgner et al. 2000; Okiyama et al. 2005; Matsumoto et al. 2014). In humans, the rate of infection of *H. suis* ranges

Received: 12 May 2017; Accepted: 10 August 2017

© FEMS 2017. All rights reserved. For permissions, please e-mail: [journals.permissions@oup.com](mailto:journals.permissions@oup.com)

between 0.2% and 6% (Okiyama et al. 2005; Haesebrouck et al. 2009). However, in experimental murine models, gastric MALT lymphoma-like lesions were induced by long-term infection with *H. suis* in nearly 100% of C57BL/6J mice (Nakamura et al. 2007), suggesting that this bacterium is more closely related than other *Helicobacter* species to gastric lymphomagenesis.

Unlike the gut, the gastric mucosa does not normally contain MALT, and the increased frequency of lymphoid neogenesis at this site represents a condition with a high-risk of generating MALT-type gastric lymphoma (Mazzucchelli et al. 1999). Previous reports showed that *H. suis* derived from pig stomachs colonized the stomachs of C57BL/6J mice and subsequently induced the formation of gastric lymphoid follicles consisting of B cells, CD4<sup>+</sup> T cells, dendritic cells, and follicular dendritic cells (FDCs) (Yamamoto et al. 2011; Yang et al. 2015). These cells are regarded as ectopic or tertiary lymphoid tissues that have the potential to progress to gastric MALT lymphoma when stimulated by the persistent presence of bacterial antigens (Carragher, Rangel-Moreno and Randall 2008; Wharry, Haines and Carroll 2009).

In recent years, some of the key molecular determinants that contribute to the generation of tertiary lymphoid tissues have been identified. These include tumor necrosis factor (TNF) family members and lymphotoxin (LT)- $\alpha_1\beta_2$  (LT $\alpha_1\beta_2$ ). Chronic antigen stimulation leads to the persistent activation of innate and adaptive immune cells in inflamed tissues and to the increased expression of LT $\alpha_1\beta_2$  by activated B and T cells and lymphoid chemokines by resident stromal cells. When LT $\alpha_1\beta_2$  and TNF- $\alpha$  bind to their respective receptors, lymphotoxin-beta receptor (LT $\beta$ R) and TNFR1, respectively, the nuclear factor kappa B (NF- $\kappa$ B) signaling pathway is activated and subsequently induces a set of chemokines known as lymphoid or homeostatic chemokines (i.e. CC-chemokine ligand 19 (CCL19), CCL21, CXCL12 and CXCL13) that regulate lymphocyte homing and compartmentalization in ectopic lymphoid tissues (Aloisi and Pujol-Borrell 2006; Wharry, Haines and Carroll 2009). Furthermore, we found that the B lymphocyte chemoattractant CXCL13 was crucial for the development of *H. suis* infection-induced gastric lymphoid follicles because treatment with an anti-CXCL13 factor effectively inhibited the formation of gastric lymphoid follicles (Yamamoto et al. 2014).

Obesity is an important public health problem around the world. It increases the risk of many chronic diseases, such as cardiovascular diseases and diabetes. Moreover, obesity is correlated with an increased risk of certain tumors, including gastric cancer and malignant lymphoma (Kanda et al. 2010; Lichtman 2010; Song et al. 2015). For instance, high-fat-diet-induced obesity increased proinflammatory immune responses and accelerated gastric carcinogenesis in *H. felis*-infected mice (Ericksen et al. 2014), and a gastric MALT lymphoma in an obese patient entered complete remission after the patient lost 20 kg of weight (Helman et al. 2011). Additionally, obesity is recognized as a low-grade chronic inflammatory state that involves a chemokine network that contributes to a variety of diseases. High-fat-diet-induced obesity increased both CCL19 and CCL21 levels in the lymph nodes (LN) of mice (Jung et al. 2015), and diet-induced obese mice exhibited a robust increase in CXCL12 expression in white adipose tissue (Kim et al. 2014). Based on these findings, we hypothesized that obesity might increase the expression of lymphoid chemokines in the stomach and thereby promote *H. suis* infection-induced gastric MALT formation. In this study, we investigated the effect of high-fat-diet-induced obesity on the formation of gastric lymphoid follicles in the stomachs of mice infected with *H. suis*.

## MATERIALS AND METHODS

### Mice

All procedures and animal experiments were approved by the Animal Care and Use Committee of Qingdao University based on current ethical standards. C57BL/6 wild-type (WT) mice (18–20 g) were purchased from Peng Yue Experimental Animal Breeding Ltd. (Jinan, China). All mice were specific pathogen-free and bred under standard laboratory conditions.

### *Helicobacter suis* infection and mouse diet

*Helicobacter suis* from pig stomachs with natural infections was maintained in the stomachs of C57BL/6 WT mice according to the methods used in previous reports (Baele et al. 2008; Yamamoto et al. 2011) because this bacterium cannot be reliably cultivated *in vitro* in our laboratory. Briefly, six pig stomachs were obtained from a slaughterhouse and incubated with 1% HCl for 1 h. Then the gastric mucosal homogenates from red lesions in pig stomachs were collected by scraping with a glass slide. Six-week-old female C57BL/6J mice were infected with *H. suis* by oral gavage with this homogenate. The resulting *H. suis*-infected donor mice were confirmed to carry only *H. suis* and no other *Helicobacter* species (i.e. *H. pylori*, *H. rodentium*, *H. typhlonium*, *H. hepaticus* and *H. muridarum*) in their stomachs and the infection condition was checked every 6 months by PCR according to the methods described in a previous report (Yamamoto et al. 2011). Forty C57BL/6 female (8 weeks old) WT mice were randomly divided into the four following groups containing 10 mice each: normal control (NC) group, *H. suis*-infected (HS) group, high-fat diet (HFD) group and *H. suis*-infected plus high-fat diet (HS + HFD) group. The same amount of gastric mucosal homogenate was obtained from *H. suis*-infected donor mice and orally administered to the mice in the HS and HS + HFD groups to initiate infection. The mice in the NC and HFD groups were given an equal volume of gastric mucosal homogenate obtained from non-infected WT mice. The mice in the HFD and HS+HFD groups were fed a high-fat diet (45% of calories from fat, Research Diets 12451, New Brunswick, NJ), and the mice in the NC and HS groups were fed a standard chow diet (13% of calories from fat) beginning 1 week post-infection. The body weights of the mice in each group were measured every week.

### Histological examination

At 24 weeks after each distinct diet was begun, all of the mice were sacrificed using cervical dislocation while under anesthesia. The stomachs were then resected, opened at the outer curvature, and sliced longitudinally from the esophagus to the duodenum. Half of each stomach was embedded in paraffin wax, one-quarter of each stomach was used for RNA extraction, and the remaining quarter of each specimen was used to extract protein, as described below. The number and major axis length of clearly identifiable gastric lymphoid follicles were determined in three specimens from each mouse in a blinded manner using a microscope. The major axis of the lymphoid follicles was measured using the scale bar of a microscope. A fraction that was <10  $\mu$ m was rounded down (Nobutani et al. 2010).

### Urease Activity Assay

The stomachs in HS group and HS+HFD group were collected and sliced longitudinally from the esophagus to the duodenum. Half of each stomach was weighed and then homogenized in

phosphate buffered saline (PBS) with protease inhibitors. After centrifugation at  $10\,000 \times g$  for 10 min at  $4^{\circ}\text{C}$ , the supernatant fluid in each group was collected and adjusted to the same volume. The urease activity was detected according to the protocol of Urease Activity Assay Kit (BioVision, Milpitas, CA).

### Quantitative real-time PCR

The mucosal and submucosal layers of the mouse stomachs in each group and the human B cells collected as described above were homogenized using TRIZOL reagent (Invitrogen, Carlsbad, CA). RNA was extracted from these homogenates and subjected to reverse transcription using a cDNA Reverse Transcription Kit (Applied Biosystems, Foster City, CA). Quantitative real-time PCR was performed using Power SYBR Green PCR Master Mix (Applied Biosystems) and an ABI Prism 7500 Real Time PCR system (Applied Biosystems) according to the manufacturer's instructions. The following specific primer pairs were used for real-time PCR.

*Helicobacter suis*-specific 16S rRNA gene: 5'-AGACAAAGCC TCCCAACAAC-3' and 5'-ATC ACTGACGCTGATTGCAC-3'; CXCL13: 5'-CATAGATCGGATTCAAGTTACGC C-3' and 5'-TCTTGG TCCAGATCACAACCTTCA-3'; CXCR5: 5'-AACATCCTGG TGCTG GTAATCC-3' and 5'-GGCTACTGCGAGGTGGAACA-3'; CCL19: 5'-C CTGGGAACATCGTGAAAG-3' and 5'-AGCCCCTTAGTGTGGT GAACAC-3'; CCL21: 5'-AGGAAGAACCAGGGAACCTC-3' and 5'-AGGGTGTGTCTGTTCA GTTCTC-3'; CCR7: 5'-CAAGAACCAAAA AGCAGACCC-3' and 5'-GACAAGGA GAGCCACCACC-3'; CXCL12: 5'-TGACGGTAAACCAGTCAGCC-3' and 5'-C TTGCATCT CCCACGGATGT-3'; CXCR4: 5'-ATCTGTGACCGCCTTTACCC-3' and 5'-AACAGGAGAGGATGACGATGC-3'; CXCR7: 5'-AACCTCTTTGG GAG CATCTTCTT-3' and 5'-GGTGCCGGTGAAGTAGGTGAT-3'; TNF- $\alpha$ : 5'-CATC TTCTCAAATTCGAGTGACAA-3' and 5'-TGGGAGTAGACAAGGTACAACC C-3'; TNFR1: 5'-TCCGCTTG CAAATGTCACA-3' and 5'-GGCAACAGCACCCG AGTAC-3'; LT $\alpha$ : 5'-GCTTGGCACCCTCCTGTC-3' and 5'-GATGCCATGGGT CAAGT GCT-3'; LT $\beta$ : 5'-CCAGCTGCGGATTCTACACCA-3' and 5'-AGCC GTT GCCACTCATCC-3'; LT $\beta$ R: 5'-CCAGATGTGAGATCCAG GGC-3' and 5'-GAC CAGCGACAGCAGGATG-3'; NF- $\kappa$ B<sub>1</sub> gene: 5'-CGGGATAGTGACAGCGTCT GT-3' and 5'-CAGTAAGAGACTCT GTAAAGCTGAGTTTG-3'; NF- $\kappa$ B<sub>2</sub> gene: 5'-GCCCGAGCGTTGCT GGAATA-3' and 5'-CGCCGAGTACTGAGCGTGA T-3'; and  $\beta$ -actin: 5'-AAGGCCAACCTGAAAAGAT-3' and 5'-GTGGTACGACCAG AGGCATAC-3'. To compare relative gene expression levels, the comparative CT ( $\Delta\Delta\text{CT}$ ) method was used, and all measurements were normalized using  $\beta$ -actin cDNA as an endogenous control.

### Western Blot analysis

Cytoplasmic and nuclear proteins were extracted from the stomachs of mice in each group using NE-PER Nuclear and Cytoplasmic Extraction Reagents (Thermo Scientific Inc., Bremen, Germany) in the presence of Protease and Phosphatase Inhibitors (Abcam, Cambridge, UK), and the lysates were then boiled with the appropriate amount of sodium dodecyl sulfate-polyacrylamide gel electrophoresis (SDS-PAGE) loading buffer. Equal amounts of lysates were separated using SDS-PAGE and then transferred onto nitrocellulose membranes. The membranes were soaked in a blocking solution (1% skim milk and 0.05% Tween 20-PBS) for 1 h and then incubated with primary antibodies (purchased from Santa Cruz Biotechnology (Dallas, Texas) and Abcam) for p65, phospho-p65, I $\kappa$ B $\alpha$ , phospho-I $\kappa$ B $\alpha$ , p100, p52 and  $\beta$ -actin for 2 h. After the membranes were washed

with Tween 20-PBS, they were incubated with the appropriate horseradish peroxidase (HRP)-conjugated secondary antibodies for 1 h. Specific bands were visualized using ECL Western Blot Detection Reagents (GE Healthcare, Little Chalfont, UK).

### Statistical analysis

All results are shown as the means  $\pm$  SD. Student's t-test was used for comparisons between two groups, and non-repeated measures analysis of variance was used for comparisons between three or more groups to analyze statistical significance. A level of probability of 0.05 or 0.01 was regarded as the significance criterion.

## RESULTS

### Body weights were significantly higher in the mice in the high-fat-diet groups than in those fed a standard chow diet

The body weights of the mice in each group were measured every week and found to have gradually increased in parallel with the length of infection (Fig. 1A). At 24 weeks after each distinct diet was begun, the body weights of the mice in the high-fat-diet groups were significantly higher than the body weights of the mice fed a standard chow diet. There were no significant differences between the infected and uninfected groups fed the same diet (Fig. 1B), suggesting that infection with *Helicobacter suis* did not itself significantly affect body weight.

### Diet-induced obesity promotes the formation of gastric lymphoid follicles in *Helicobacter suis*-infected mice by upregulating lymphoid chemokines but does not affect the bacterial load in the stomach

At 24 weeks after each distinct diet was begun, gastric lymphoid follicles were observed in the *H. suis*-infected mice but not the non-infected mice. The mean number of follicles and mean major axis size of the follicles were higher in the stomachs of *H. suis*-infected mice fed a high-fat diet than in those fed a standard chow diet (Fig. 2A–C). The relative number of *H. suis* and urease activity in the stomachs of the mice was evaluated using real-time PCR with a specific 16S rRNA primer and Urease Activity Assay Kit, respectively. The results showed that there was no significant difference in bacterial load and urease activity between the HS and HS + HFD groups (Fig. 3A and B). The mRNA expression levels of the lymphoid tissue formation-related chemokines CXCL13, CCL19, CCL21 and CXCL12 and their receptors, CXCR5 (for CXCL13), CCR7 (for CCL19 and CCL21), CXCR4 and CXCR7 (for CXCL12), in the stomachs of mice in the HS + HFD group were higher than the levels observed in the HS group (Fig. 3C–E). These data indicate that high-fat-diet-induced obesity upregulated lymphoid chemokines in the stomach and promoted the formation of gastric lymphoid follicles in mice infected with *H. suis* but did not affect the bacterial load in the stomach.

### The expression levels of TNF- $\alpha$ , LT and their receptors and the activation of the NF- $\kappa$ B signaling pathway in the stomach were enhanced by high-fat-diet-induced obesity in mice infected with *Helicobacter suis*

Previous studies have demonstrated that the activation of NF- $\kappa$ B is mediated by LTs and that TNF- $\alpha$  is essential for the

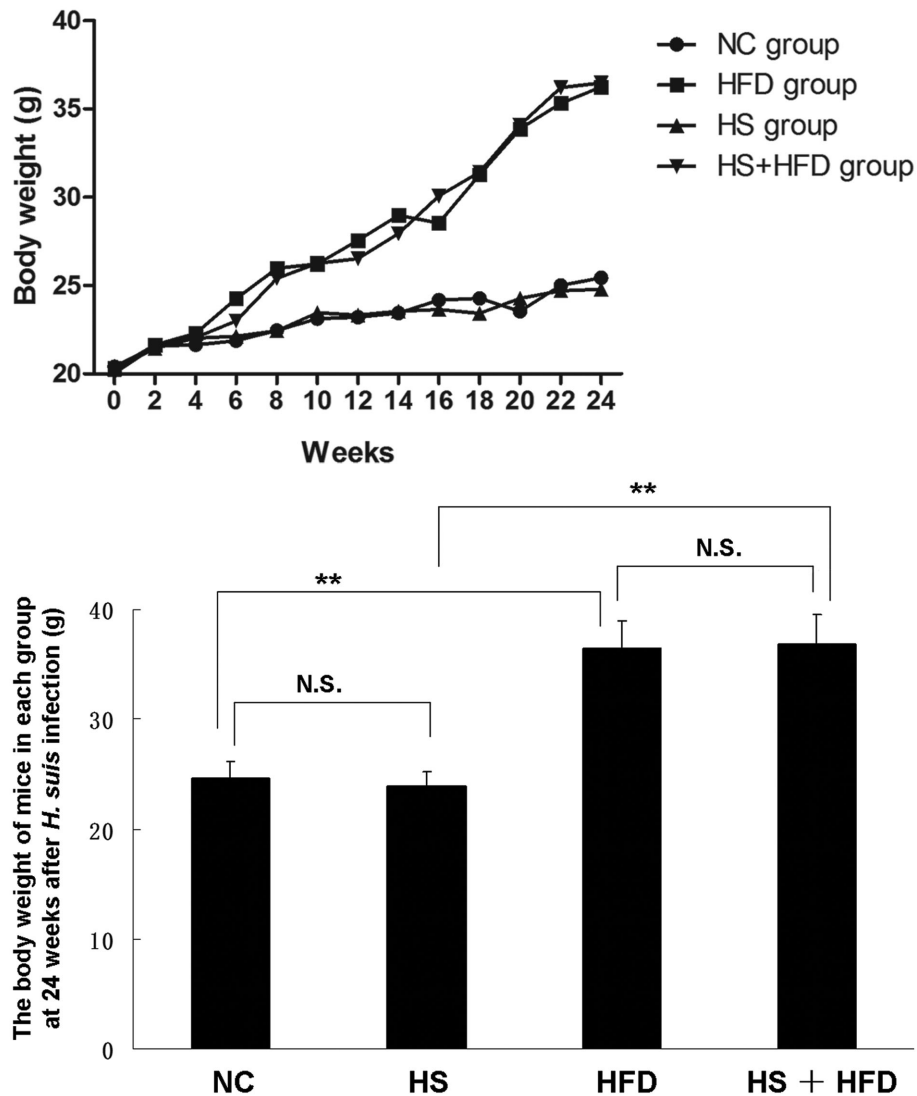

**Figure 1.** The relationship between changes in body weight in each group and infection time and body weights at 24 weeks after *H. suis* infection. Forty C57BL/6 female (8 weeks old) wild-type mice were randomly divided into the following 4 groups of 10 mice each: normal control (NC), *H. suis*-infected (HS), high-fat diet (HFD) and *H. suis*-infected plus high-fat diet (HS+HFD). The mice in the NC and HS groups were fed a standard chow diet, and the mice in the HFD and HS+HFD groups were fed a high-fat diet beginning 1 week post-infection. The body weights of the mice in each group were measured every week. Changes of the body weights of the mice in each group are shown according to the length of infection (A) and were compared at 24 weeks post-infection (B). The data are shown as the mean or mean  $\pm$  SD ( $n = 10$ ). \*\*Significant difference ( $P < 0.01$ ); N.S., no significant difference ( $P > 0.05$ ).

organogenesis and construction of secondary lymphoid tissues (Mebius 2003; Weih and Caamaño 2003; Hoffmann and Baltimore 2006). The NF- $\kappa$ B family consists of five members, including RelA, RelB, cRel, NF- $\kappa$ B<sub>1</sub> (p50) and NF- $\kappa$ B<sub>2</sub> (p52). In the canonical pathway, the TNF receptor (TNFR) transmits a signal that induces the phosphorylation and degradation of inhibitor of NF- $\kappa$ B (I $\kappa$ B), triggers the translocation of the RelA-p50 complex from the cytoplasm to the nucleus (canonical pathway) and initiates the expression of a broad array of inflammatory genes (Hoffmann, Leung and Baltimore 2003; Hoffmann and Baltimore 2006). Via an alternative non-canonical pathway, the LT $\beta$ R triggers the phosphorylation and processing of p100 (a NF- $\kappa$ B<sub>2</sub> gene product), and this generates p52, which activates the RelB-p52 complex (non-canonical pathway), which is known to regulate a restricted set of genes that includes CXCL13, CCL19, CCL21 and CXCL12 (Dejardin *et al.* 2002; Hoffmann and Baltimore 2006;

Wharry, Haines and Carroll 2009). Importantly, the activation of both the canonical and non-canonical NF- $\kappa$ B pathways is essential to induce CXCL13 (Suto *et al.* 2009). Therefore, we analyzed the expression of factors upstream of the NF- $\kappa$ B signaling pathway, including TNF- $\alpha$ , LT $\alpha$ , and LT $\beta$ , their receptors, TNFR1 and LT $\beta$ R, and the NF- $\kappa$ B<sub>1</sub> and NF- $\kappa$ B<sub>2</sub> genes, using real-time PCR. The results showed that the expression levels of these markers were higher in the stomachs of mice in the HS + HFD group than in the stomachs of mice in the HS group (Fig. 4A–C). Next, we performed western blot analysis using antibodies for NF- $\kappa$ B signaling pathway-related proteins, and the results showed that the expressions of p65 in nuclear and phospho-p65, phospho-I $\kappa$ B $\alpha$ , p100 and p52 in cytoplasm were upregulated in the stomachs of *H. suis*-infected mice and enhanced by high-fat-diet-induced obesity (Fig. 5A and B). These findings indicated that diet-induced obesity enhanced the activation of TNFR1/LT $\beta$ R

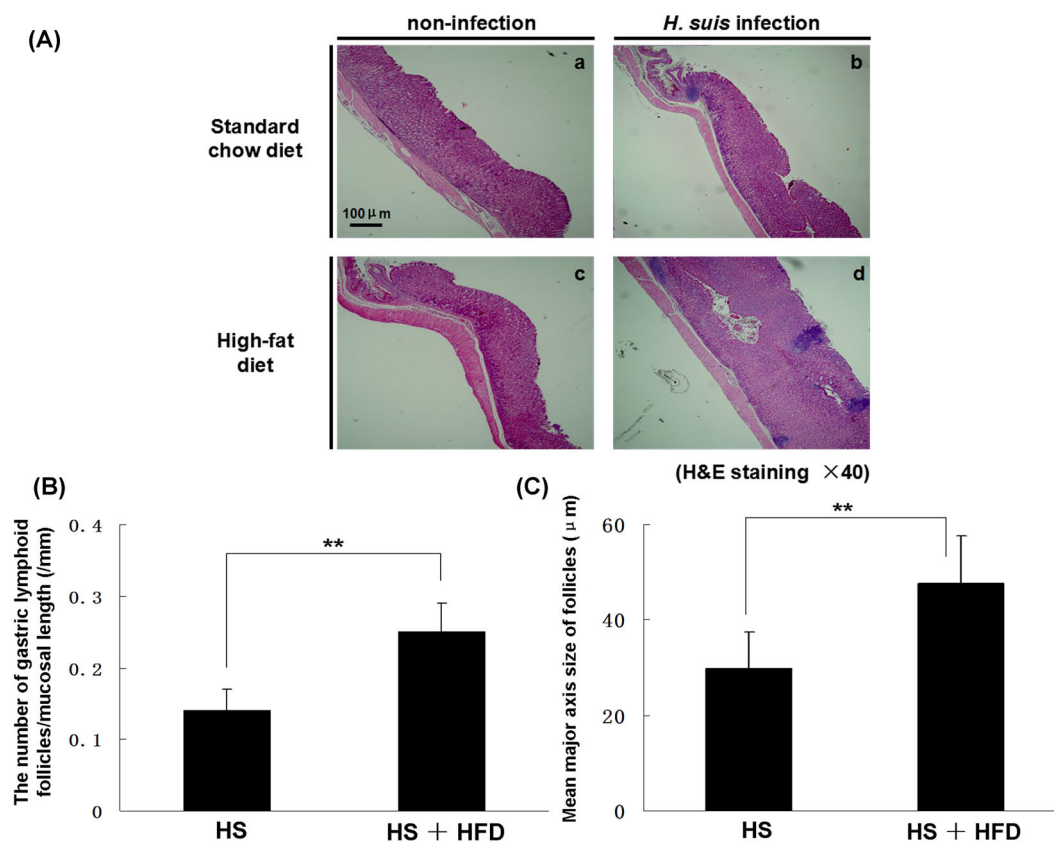

**Figure 2.** The formation of lymphoid follicles in the gastric mucosa and the bacterial load in the stomachs of mice in each group at 24 weeks post-*H. suis* infection. (A) Histological examinations of the gastric mucosa in each group ( $n = 10$ ) were performed using hematoxylin and eosin staining at 24 weeks post-*H. suis* infection. (a) NC group; (b) HS group; (c) HFD group; (d) HS+HFD group. Original magnification:  $\times 40$ . The black bar indicates  $100\ \mu\text{m}$ . The mean number of lymphoid follicles (B) and the mean major axis size of the lymphoid follicles in the gastric mucosae of mice in the HS and HS+HFD groups (C) were determined by examining hematoxylin and eosin-stained specimens under a microscope in a blinded manner. The data shown are representative of at least three independent experiments and are shown as the mean  $\pm$  SD ( $n = 10$ ). \*\*Significant difference ( $P < 0.01$ ).

and the downstream NF- $\kappa$ B signaling pathway in mice infected with *H. suis*, and these effects contributed to the upregulation of lymphoid chemokines and the formation of gastric lymphoid follicles.

## DISCUSSION

*Helicobacter suis* is the most prevalent gastric NHPH species in humans and is transmitted to humans most likely via direct or indirect contact with pigs, which are their main reservoir (Hae-sebrouck et al. 2009). Compared to *H. pylori*, which is known to cause predominantly metaplastic/dysplastic changes, *H. suis* rarely induces gastric adenocarcinoma, and *H. suis*-associated gastritis appears to be less active and less severe. However, the risk of developing MALT lymphoma is higher in *H. suis* infections (Morgner et al. 2000; O'Rourke et al. 2004a; Nakamura et al. 2007). The formation of *Helicobacter*-induced MALT lymphoma is a less common outcome in *H. pylori* infection because it requires a prolonged and complex interaction among the bacteria, the host epithelium and the host immune system. Therefore, *H. suis*-infected animals are ideal models for investigating the mechanism underlying gastric MALT formation and the pathogenesis of gastric MALT lymphoma.

There is an increasing recognition that being overweight and obese impacts the development of a variety of cancers that can occur at a diversity of sites. Obesity is associated with an in-

creased incidence of colorectal cancer, esophageal adenocarcinoma, and cancers of the gastric cardia, gallbladder, pancreas, liver, kidney, and thyroid as well as non-Hodgkin lymphoma (Larsson and Wolk 2011; Wolin, Carson and Colditz 2013). Furthermore, obesity is a condition involving chronic low-grade inflammation that is characterized by abnormal cytokine production, immune activation, and increased inflammatory signaling (Alemán et al. 2014). Numerous chemokines, including CCL19 and CXCL12, are expressed by adipocytes under obesity-associated chronic inflammation conditions, and their expression is predominantly regulated by NF- $\kappa$ B, which is the main mediator of TNF- $\alpha$ -induced chemokine expression (Tourniaire et al. 2013; Kim et al. 2014). However, obesity also affects the responsiveness of immune cells in some organs to chemokines. For instance, obesity increased lymphocyte hyper-responsiveness to chemokines in the liver and is directly responsible for a higher level of CXCL12- and CXCL13-induced chemotaxis in CD4<sup>+</sup> T and B cells (Bigorgne et al. 2008). Many studies have focused primarily on the direct effect of adipose-derived factors. However, little is known regarding the effect of obesity on the expression of chemokines in gastric tissues or the formation of chronic inflammation-induced acquired MALT. In this study, we provide the first evidence showing that high-fat-diet-induced obesity enhances the expression of lymphoid chemokines, including CXCL13, CCL19, CCL21 and CXCL12, and their receptors in the stomachs of animals infected with *H. suis*, which also have

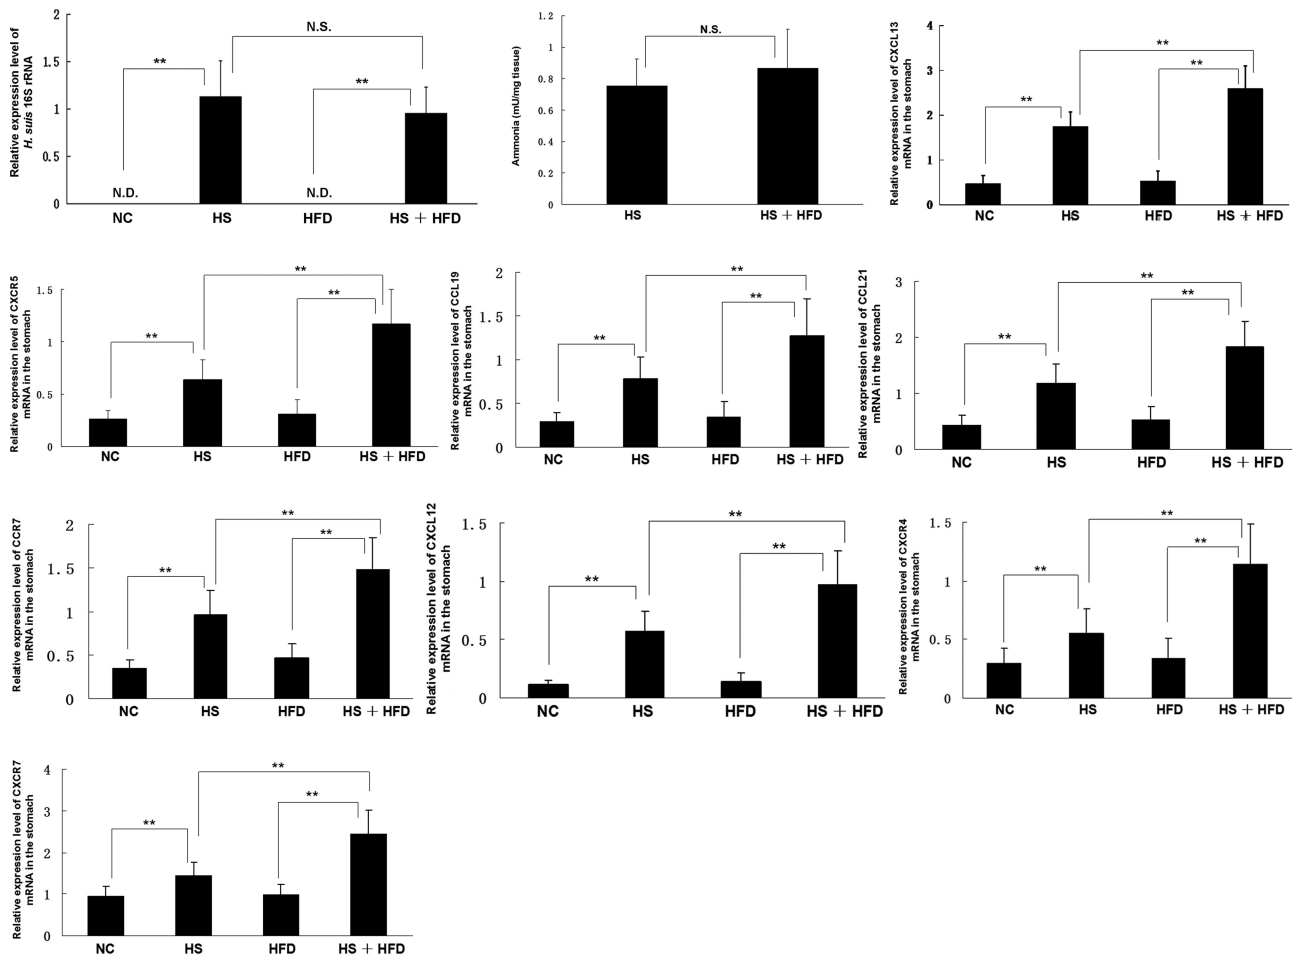

**Figure 3.** The relative bacterial load, urease activity and the expression of lymphoid chemokines and their receptors in the stomachs of mice in each group at 24 weeks post-*H. suis* infection. The relative expression level of the *H. suis* 16S rRNA (A), urease activity (B) and the mRNA expression levels of lymphoid chemokines and their receptors (C–E) in the stomachs of mice in each group at 24 weeks post-*H. suis* infection were estimated using real-time PCR and Urease Activity Assay Kit, respectively. The quantitative values were normalized to the level of mouse  $\beta$ -actin expression in each sample. The data shown are representative of at least three independent experiments and are shown as the mean  $\pm$  SD ( $n = 10$ ). \*\*Significant difference ( $P < 0.01$ ); N.D., not detected; N.S., no significant difference ( $P > 0.05$ ).

more and larger gastric lymphoid follicles, but did not affect the bacterial load in the stomach. These data demonstrate that obesity promotes the upregulation of lymphogenesis-related factors and contributes to the formation of gastric MALT.

It has been reported that the NF- $\kappa$ B signal transduction pathway plays an essential role in the development of secondary lymphoid organs and the recruitment of cells to these tissues (Weih and Caamaño 2003). The activation of NF- $\kappa$ B by the  $LT\alpha_1\beta_2$ - $LT\beta$ R-NIK-IKK $\alpha$  pathway is crucial to the development and maintenance of a normal spleen architecture, FDC maturation and the organogenesis of the LN, Peyer's patches and nasopharyngeal-associated lymphoid tissue. However, TNF-TNFR1-IKK $\gamma$ / $\beta$  signaling is required for the proper cellular and structural organization of B-cell follicles and the development of FDC networks (Weih and Caamaño 2003). Furthermore, the engagement of  $LT\beta$ R by  $LT\alpha_1\beta_2$  results in the transmission of a signal that is required to induce CXCL13 by promoting cooperation among multiple signaling pathways, including the canonical and non-canonical NF- $\kappa$ B pathways, and the latter is also responsible for the production of CCL19, CCL21 and CXCL12 (Dejardin et al. 2002; Hoffmann and Baltimore 2006; Suto et al. 2009; Wharry, Haines and Carroll 2009). Interestingly, we found that both the canonical and non-canonical NF- $\kappa$ B signal-

ing pathways are activated in the stomach in animals in which obesity was induced by a high-fat diet. This activation induced the upregulation of lymphoid chemokines and accelerated the development of gastric MALT in animals infected with *H. suis*.

In summary, in this study, we reveal that the *H. suis*-induced formation of gastric lymphoid follicles is accelerated by high-fat-diet-induced obesity. The mechanism underlying this relationship might involve the activation of the NF- $\kappa$ B signaling pathway and the induction of lymphoid chemokines in the stomach. Because multiple mechanisms are implicated in the relationship between obesity and neoplasia, including inflammatory changes, altered adipokine profiles, insulin resistance and adipose tissue hypoxia, we expect that future investigations will identify the specific pathogenesis involved in obesity-related gastric diseases, especially those induced by *Helicobacter* infection.

## FUNDING

This work was supported by the National Natural Science Foundation of China (No. 81572302 and No. 81502025).

**Conflict of interest.** None declared.

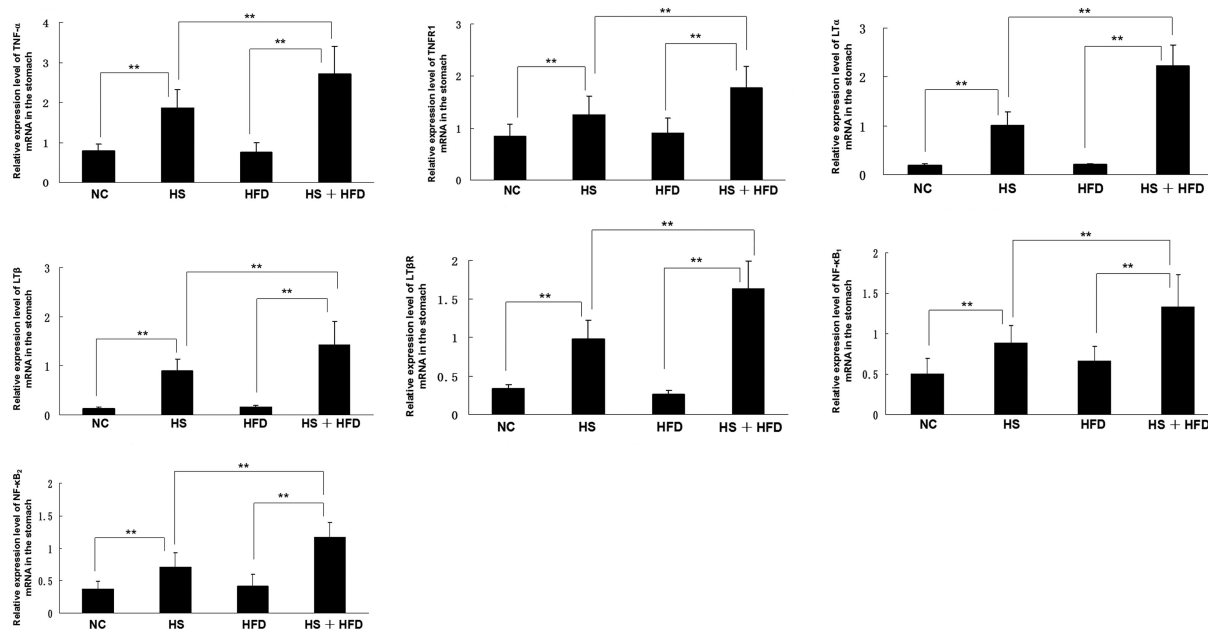

**Figure 4.** The expression levels of TNF- $\alpha$  and lymphotoxin and their receptors, NF- $\kappa$ B<sub>1</sub> and NF- $\kappa$ B<sub>2</sub>, in the stomachs of mice in each group at 24 weeks post-*H. suis* infection. The mRNA expression levels of TNF- $\alpha$  and its receptor, TNFR1 (A), and lymphotoxin and its receptor, LT $\beta$ R (B), in addition to the expression levels of NF- $\kappa$ B<sub>1</sub> and NF- $\kappa$ B<sub>2</sub> (C) in the stomachs of mice in each group were estimated using real-time PCR at 24 weeks post-*H. suis* infection. The quantitative values were normalized to the level of mouse  $\beta$ -actin expression in each sample. The data shown are representative of at least three independent experiments and are shown as the mean  $\pm$  SD (n = 10). \*\*Significant difference ( $P < 0.01$ ).

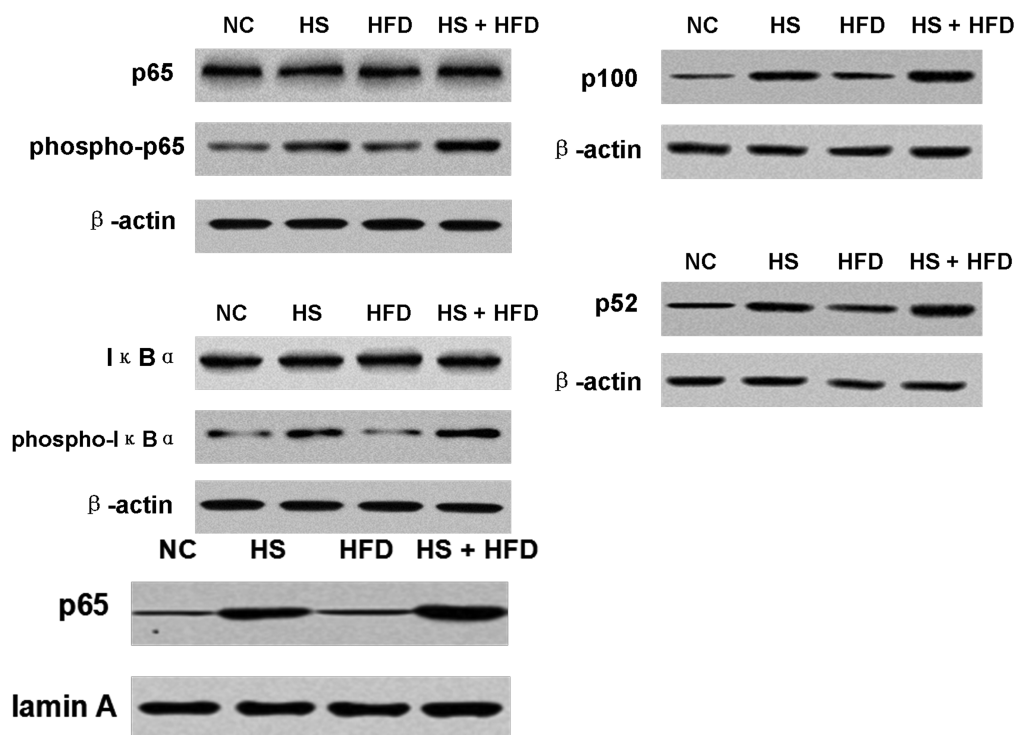

**Figure 5.** The activation of the NF- $\kappa$ B signaling pathway in the stomachs of mice in each group at 24 weeks post-*H. suis* infection. The expressions of p65, phospho-p65, I $\kappa$ B $\alpha$ , phospho-I $\kappa$ B $\alpha$  in cytoplasm and p65 in nuclear (A) and the expressions of p100 and p52 in cytoplasm (B) in the stomachs of mice in each group at 24 weeks post-*H. suis* infection was detected using western blot analysis with corresponding antibodies. The data shown are representative of at least three independent experiments and typical images are shown.

## REFERENCES

- Alemán JO, Eusebi LH, Ricciardiello L et al. Mechanisms of obesity-induced gastrointestinal neoplasia. *Gastroenterology* 2014;**146**:357–73.
- Aloisi F, Pujol-Borrell R. Lymphoid neogenesis in chronic inflammatory diseases. *Nat Rev Immunol* 2006;**6**:205–17.
- Baele M, Decostere A, Vandamme P et al. Isolation and characterization of *Helicobacter suis* sp. nov. from pig stomachs. *Int J Syst Evol Microbiol* 2008;**58**:1350–8.
- Bigorgne AE, Bouchet-Delbos L, Naveau S et al. Obesity-induced lymphocyte hyperresponsiveness to chemokines: a new mechanism of Fatty liver inflammation in obese mice. *Gastroenterology* 2008;**134**:1459–69.
- Carragher DM, Rangel-Moreno J, Randall TD. Ectopic lymphoid tissues and local immunity. *Semin Immunol* 2008;**20**:26–42.
- Dejardin E, Droin NM, Delhase M et al. The lymphotoxin-beta receptor induces different patterns of gene expression via two NF-kappaB pathways. *Immunity* 2002;**17**:525–35.
- Erickson RE, Rose S, Westphalen CB et al. Obesity accelerates *Helicobacter felis*-induced gastric carcinogenesis by enhancing immature myeloid cell trafficking and TH17 response. *Gut* 2014;**63**:385–94.
- Haesebrouck F, Pasmans F, Flahou B et al. Gastric helicobacters in domestic animals and nonhuman primates and their significance for human health. *Clin. Microbiol Rev* 2009;**22**:202–23.
- Hellemans A, Chiers K, De Bock M et al. Prevalence of 'Candidatus *Helicobacter suis*' in pigs of different ages. *Vet Rec* 2007;**161**:189–92.
- Helman R, Teixeira PP, Mendes CJ et al. Gastric MALT lymphoma and grade II obesity: gastric bypass surgery as a therapeutic option. *Obes Surg* 2011;**21**:407–9.
- Hoffmann A, Baltimore D. Circuitry of nuclear factor kappaB signaling. *Immunol Rev* 2006;**210**:171–86.
- Hoffmann A, Leung TH, Baltimore D. Genetic analysis of NF-kappaB/Rel transcription factors defines functional specificities. *EMBO J* 2003;**22**:5530–9.
- Jung JI, Cho HJ, Jung YJ et al. High-fat diet-induced obesity increases lymphangiogenesis and lymph node metastasis in the B16F10 melanoma allograft model: roles of adipocytes and M2-macrophages. *Int J Cancer* 2015;**136**:258–70.
- Kanda J, Matsuo K, Suzuki T et al. Association between obesity and the risk of malignant lymphoma in Japanese: a case-control study. *Int J Cancer* 2010;**126**:2416–25.
- Kim D, Kim J, Yoon JH et al. CXCL12 secreted from adipose tissue recruits macrophages and induces insulin resistance in mice. *Diabetologia* 2014;**57**:1456–65.
- Larsson SC, Wolk A. Body mass index and risk of non-Hodgkin's and Hodgkin's lymphoma: a meta-analysis of prospective studies. *Eur J Cancer* 2011;**47**:2422–30.
- Lichtman MA. Obesity and the risk for a hematological malignancy: leukemia, lymphoma, or myeloma. *Oncologist* 2010;**15**:1083–101.
- Matsumoto T, Kawakubo M, Akamatsu T et al. *Helicobacter heilmannii* sensu stricto-related gastric ulcers: a case report. *World J Gastroenterol* 2014;**20**:3376–82.
- Mazzucchelli L, Blaser A, Kappeler A et al. BCA-1 is highly expressed in *Helicobacter pylori*-induced mucosa-associated lymphoid tissue and gastric lymphoma. *J Clin Invest* 1999;**104**:R49–54.
- Mebius RE. Organogenesis of lymphoid tissues. *Nat Rev Immunol* 2003;**3**:292–303.
- Morgner A, Lehn N, Andersen LP et al. *Helicobacter heilmannii*-associated primary gastric low-grade MALT lymphoma: complete remission after curing the infection. *Gastroenterology* 2000;**118**:821–8.
- Nakamura M, Murayama SY, Serizawa H et al. "Candidatus *Helicobacter heilmannii*" from a cynomolgus monkey induces gastric mucosa-associated lymphoid tissue lymphomas in C57BL/6 mice. *Infect. Immun* 2007;**75**:1214–22.
- Nobutani K, Yoshida M, Nishiumi S et al. *Helicobacter heilmannii* can induce gastric lymphoid follicles in mice via a Peyer's patch-independent pathway. *FEMS Immunol Med Microbiol* 2010;**60**:156–64.
- Okiyama Y, Matsuzawa K, Hidaka E et al. *Helicobacter heilmannii* infection: clinical, endoscopic and histopathological features in Japanese patients. *Pathol* 2005;**55**:398–404.
- O'Rourke JL, Dixon MF, Jack A et al. Gastric B-cell mucosa-associated lymphoid tissue (MALT) lymphoma in an animal model of 'Candidatus *Helicobacter heilmannii*' infection. *J Pathol* 2004a;**203**:896–903.
- O'Rourke JL, Solnick JV, Neilan BA et al. Description of 'Candidatus *Helicobacter heilmannii*' based on DNA sequence analysis of 16S rRNA and urease genes. *Int J Syst Evol Microbiol* 2004b;**54**:2203–11.
- Queiroz DM, Rocha GA, Mendes EN et al. Association between *Helicobacter* and gastric ulcer disease of the pars oesophagea in swine. *Gastroenterology* 1996;**111**:19–27.
- Roosendaal R, Vos JH, Roumen T et al. Slaughter pigs are commonly infected with closely related but distinct gastric ulcerative lesion-inducing gastrospirilla. *J Clin Microbiol* 2000;**38**:2661–4.
- Song M, Choi JY, Yang JJ et al. Obesity at adolescence and gastric cancer risk. *Cancer Causes Control* 2015;**26**:247–56.
- Suto H, Katakai T, Sugai M et al. CXCL13 production by an established lymph node stromal cell line via lymphotoxin-beta receptor engagement involves the cooperation of multiple signaling pathways. *Int Immunol* 2009;**21**:467–76.
- Tourniaire F, Romier-Crouzet B, Lee JH et al. Chemokine expression in inflamed adipose tissue is mainly mediated by NF-κB. *PLoS One* 2013;**8**:e66515.
- Weih F, Caamaño J. Regulation of secondary lymphoid organ development by the nuclear factor-kappaB signal transduction pathway. *Immunol Rev* 2003;**195**:91–105.
- Wharry CE, Haines KM, Carroll RG. Constitutive non-canonical NFkappaB signaling in pancreatic cancer cells. *Cancer Biol Ther* 2009;**8**:1567–76.
- Wolin KY, Carson K, Colditz GA. Obesity and cancer. *Oncologist* 2013;**15**:556–65.
- Yamamoto K, Nishiumi S, Yang L et al. Anti-CXCL13 antibody can inhibit the formation of gastric lymphoid follicles induced by *Helicobacter* infection. *Mucosal Immunol* 2014;**7**:1244–54.
- Yamamoto K, Tanaka H, Nishitani Y et al. *Helicobacter suis* KB1 derived from pig gastric lymphoid follicles induces the formation of gastric lymphoid follicles in mice through the activation of B cells and CD4 positive cells. *Microbes Infect* 2011;**13**:697–708.
- Yang L, Yamamoto K, Nishiumi S et al. Interferon-γ-producing B cells induce the formation of gastric lymphoid follicles after *Helicobacter suis* infection. *Mucosal Immunol* 2015;**8**:279–95.
